# Supplementary material for: Expression of Gal-9 on Dendritic Cells and Soluble Forms of TIM-3/Gal-9 in Patients Suffering from Endometriosis
Source: MDPI journal article supplement (doi:10.3390/ijms24065948), 2023-03-21
Supplement: s1 [file s1]

# Expression of Gal-9 on dendritic cells and soluble forms of TIM-3/Gal-9 in patients suffering from endometriosis

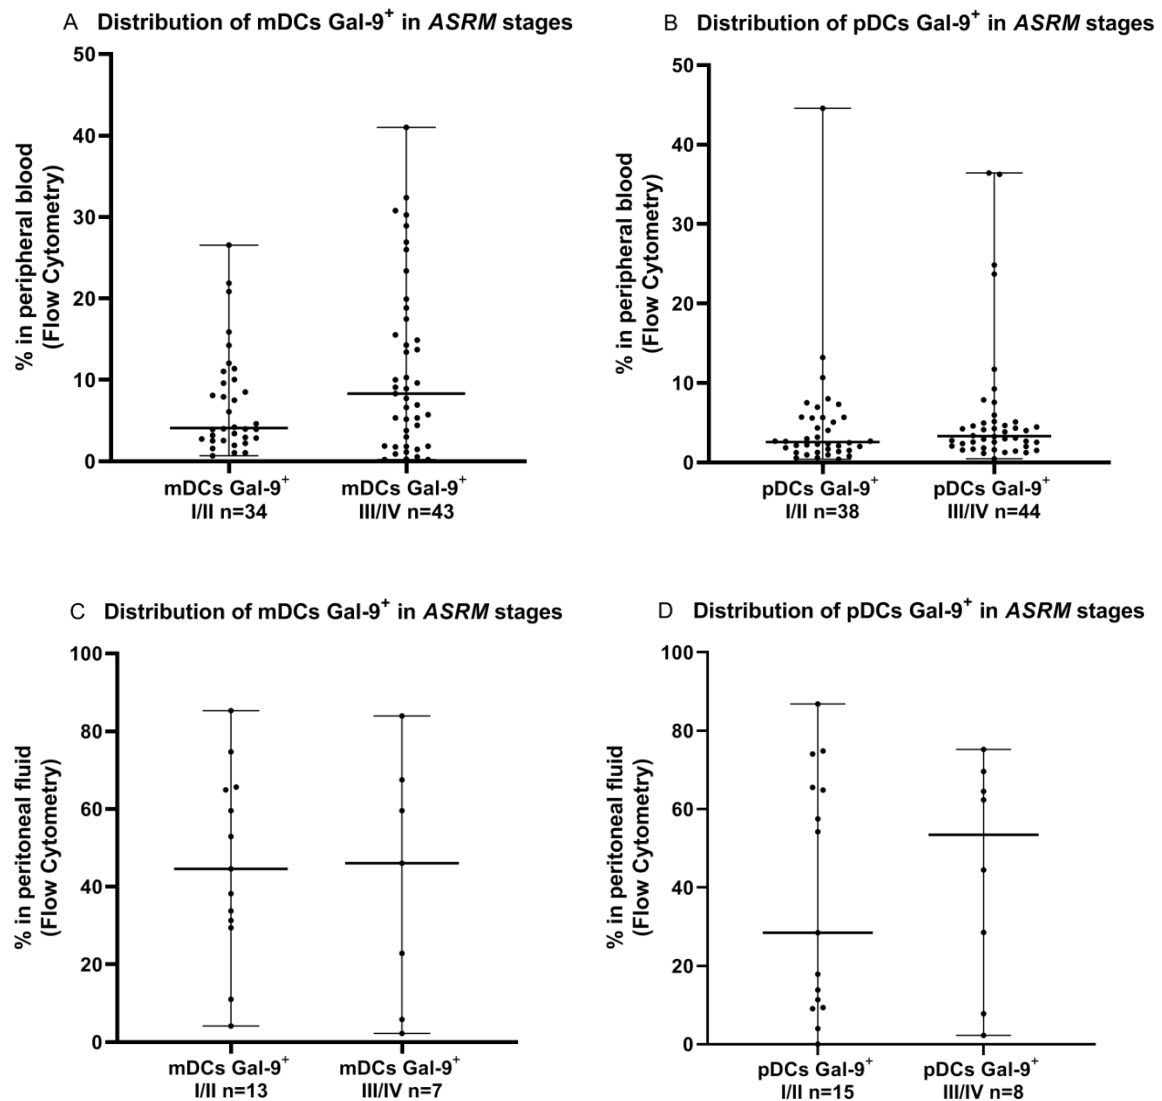

**Figure S1.** Percentage of mDCs and pDCs with Gal-9 expression in peripheral blood and peritoneal fluid in early (I/II) and late (III/IV) ASRM stages of endometriosis.

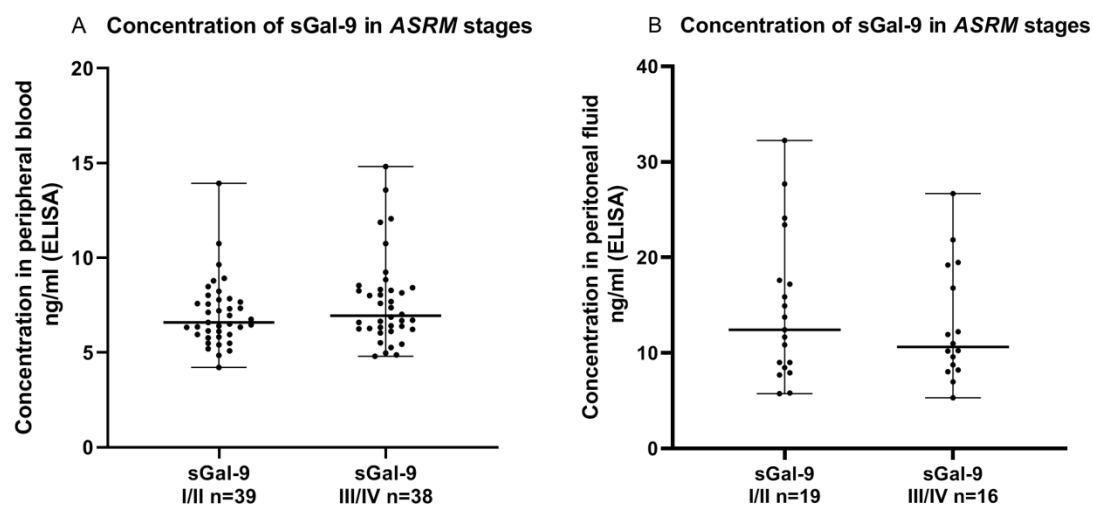

**Figure S2.** Level of sGal-9 in the plasma (A) and peritoneal fluid (B) in early (I/II) and late (III/IV) ASRM stages of endometriosis (ng/ml).

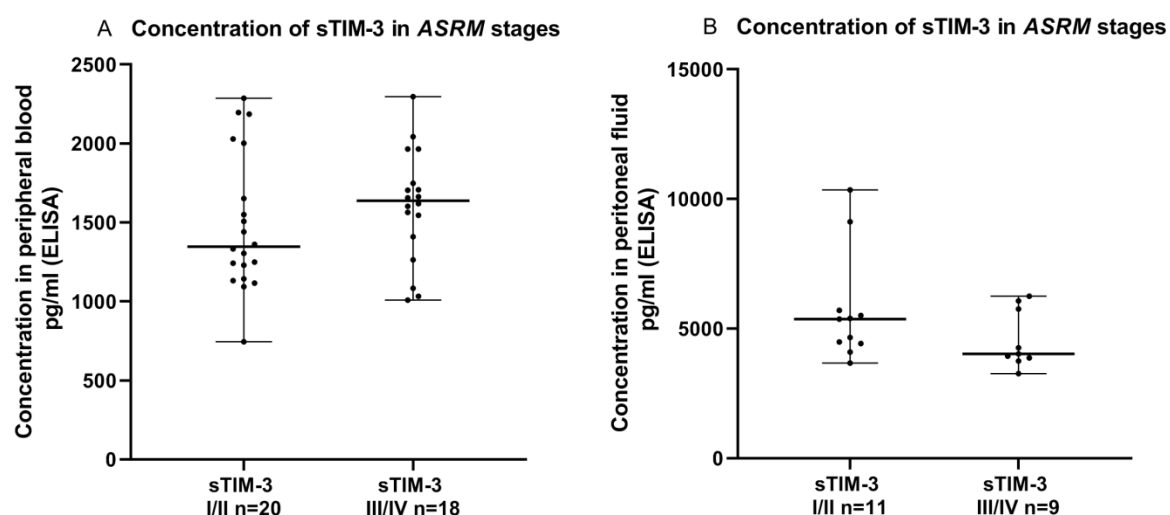

**Figure S3.** Level of sTIM-3 in the plasma and peritoneal fluid in early (I/II) (A) and late (III/IV) (B) ASRM stages of endometriosis (pg/ml).
